# Supplementary material for: Highly sensitive sensing of hydroquinone and catechol based on β-cyclodextrin-modified carbon dots
Source: Royal Society of Chemistry journal article supplement (doi:10.1039/c8ra02813c), 2018-01-01
Supplement: c8ra02813c1.pdf [file c8ra02813c1.pdf]

## High sensitive sensing of hydroquinone and catechol based on $\beta$ -cyclodextrin modified carbon dots

Zhong-Yi Lin<sup>a</sup>, Yuan-Jie Guo<sup>a</sup>, Yu-Syuan Lin<sup>a</sup>, Chih-Jui Chang<sup>c</sup>, Tai-Chia Chiu<sup>a,b</sup>, Cho-Chun Hu<sup>a,b\*</sup>

<sup>a</sup> Department of Applied Science, National Taitung University, Taitung, 95002, Taiwan

<sup>b</sup> Agriculture Products Inspection Center, National Taitung University, Taitung, 95002, Taiwan

<sup>c</sup> Department of Molecular Biology and Human Genetics, Tzu Chi University, Hualien 97004, Taiwan

Zhong-Yi Lin: a22695559@gmail.com

Yuan-Jie Guo: oooopppoooo1@gmail.com

Yu-Syuan Lin: hero1245337@gmail.com

Chih-Jui Chang: cjchang@mail.tcu.edu.tw

Tai-Chia Chiu: tcchiu@nttu.edu.tw

Cho-Chun Hu: cchu@nttu.edu.tw

Keywords: Carbon dot;  $\beta$ -cyclodextrin; Hydroquinone; Catechol

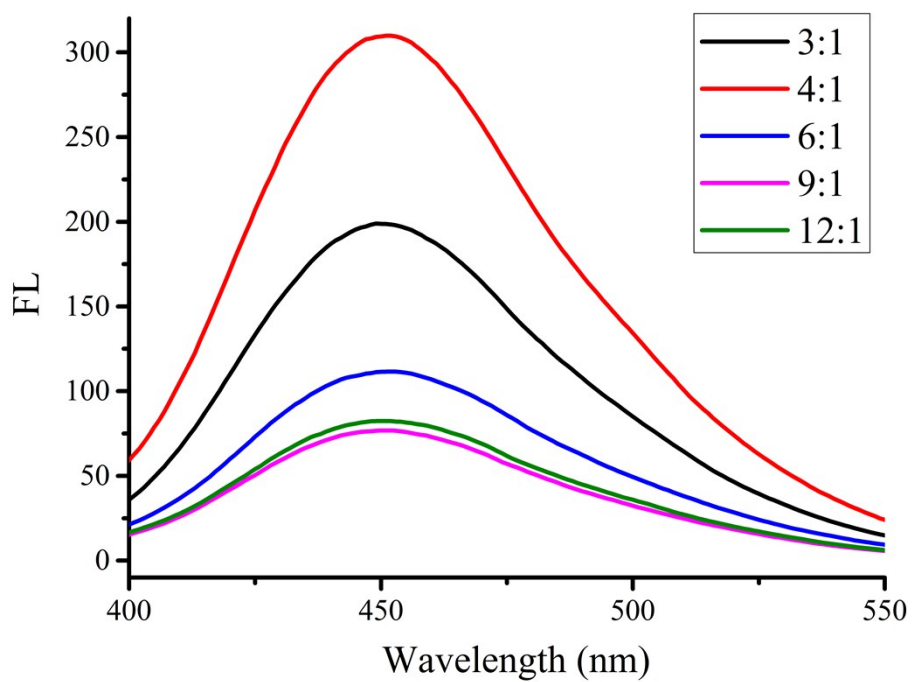

**Fig. S1.** Fluorescence spectra of C-dot and amono-6-OTs-β-CD mixed with the different ratio ( $[\text{mono-6-OTs-}\beta\text{-CD}]/[\text{C-dot}]$  v/v: (black) 3 : 1, (red) 4 : 1, (blue) 6 : 1, (pink) 9 : 1, (green) 12 : 1.

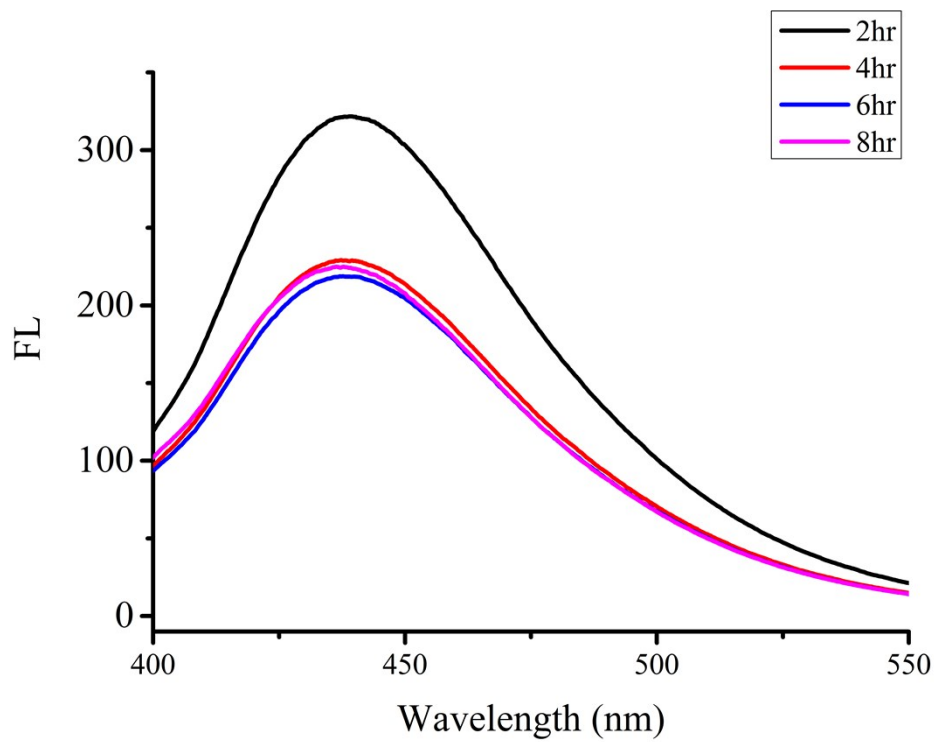

**Fig. S2.** Fluorescence spectra of the synthesized C-dot@ $\beta$ -CD at variety incubate time.

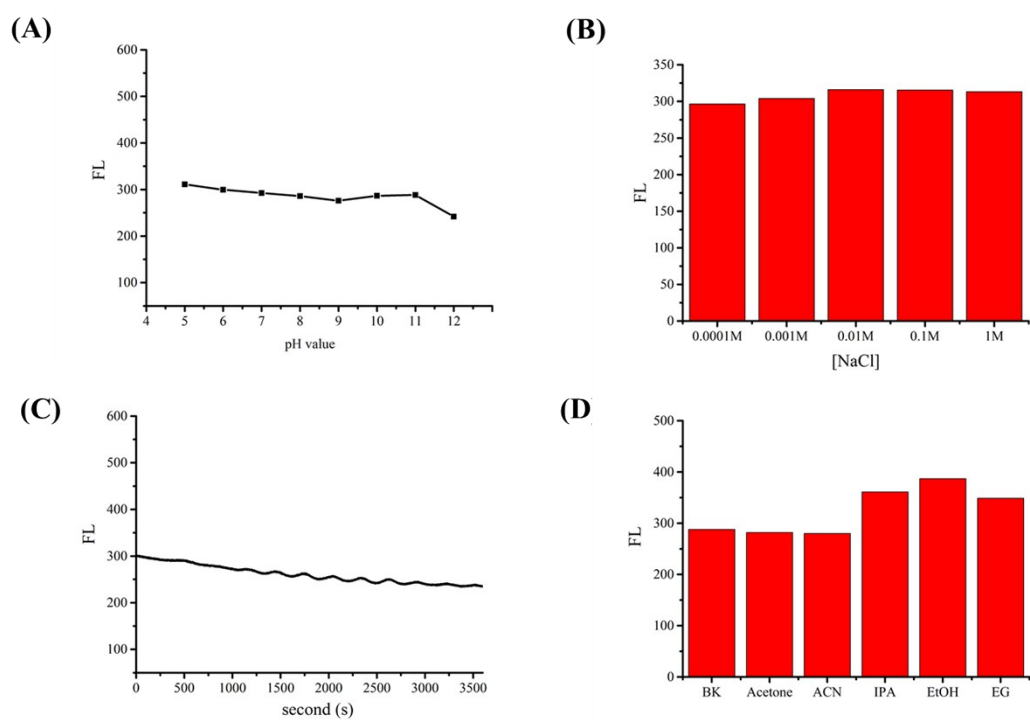

**Fig. S3.** (A) The stability of C-dot@ $\beta$ -CD at pH ranges from 5 to 12, (B) Stability of C-dot@ $\beta$ -CD in different concentrations of NaCl ranging from 0.1 mM to 1M, (C) Photostability of C-dot@ $\beta$ -CD, (D) Influence of different solvents (80% of total volume) on the fluorescence properties.

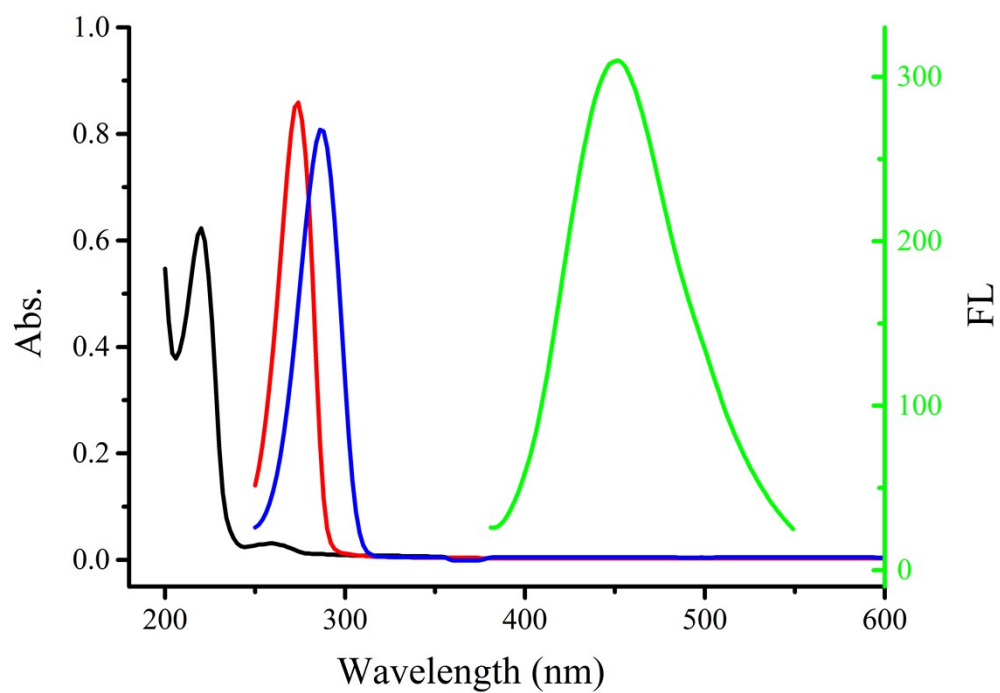

**Fig. S4.** UV-vis absorption of C-dot@ $\beta$ -CD(black), CC (red), HQ(blue) and C-dot@ $\beta$ -CD fluorescent emission(green).

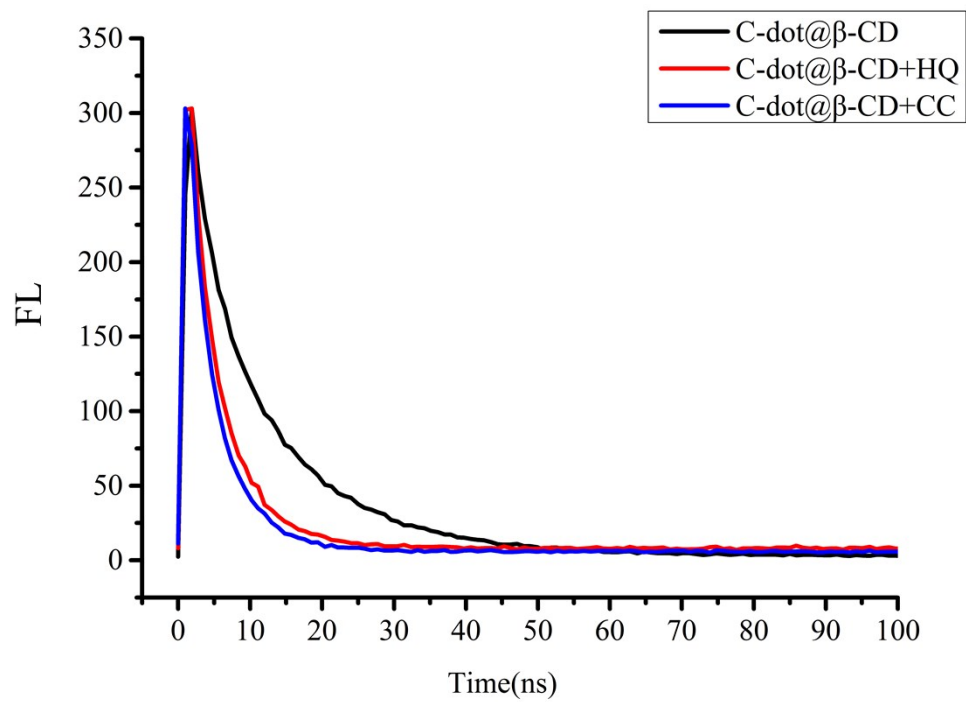

**Fig. S5.** Time-resolved decay of C-dot@β-CD (black) with HQ (red), with CC(blue).

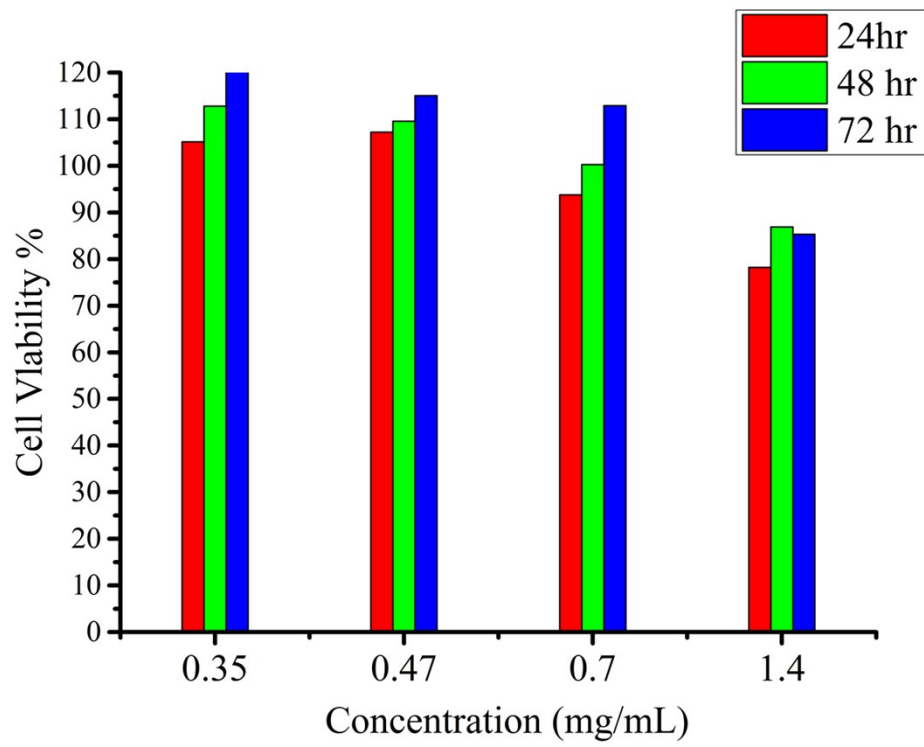

**Fig. S6.** Cell viability assay of human HeLa cells against C-dot@ $\beta$ -CD at arranged concentrations from 0.35-1.4 mg/mL.

TableS1. Time-resolved decay of C-dots in the absence and presence of catechol and hydroquinone

| Sample                     | $\tau_1$ (ns) | Area (%) | $\tau_2$ (ns) | Area (%) | Average $\tau$ (ns) |
|----------------------------|---------------|----------|---------------|----------|---------------------|
| C-dot@ $\beta$ -CD         | 13.65         | 64.08    | 3.38          | 35.92    | 9.96                |
| C-dot@ $\beta$ -CD<br>+ CC | 5.11          | 62.80    | 1.73          | 37.20    | 3.85                |
| C-dot@ $\beta$ -CD<br>+ HQ | 5.63          | 63.68    | 1.96          | 36.32    | 4.30                |
